# Supplementary material for: Tumour compartment transcriptomics demonstrates the activation of inflammatory and odontogenic programmes in human adamantinomatous craniopharyngioma and identifies the MAPK/ERK pathway as a novel therapeutic target
Source: Springer Nature journal article supplement (doi:10.1007/s00401-018-1830-2), 2018-03-14

## Supplementary Figures 1-8

### **Tumour compartment transcriptomics demonstrate the activation of inflammatory and odontogenic programmes in human adamantinomatous craniopharyngioma and identify the MAPK/ERK pathway as novel therapeutic target**

John R. Apps<sup>1,2,\*</sup>, Gabriela Carreno<sup>1</sup>, Jose Mario Gonzalez-Meljem<sup>1,3</sup>, Scott Haston<sup>1</sup>, Romain Guiho<sup>1</sup>, Julie E. Cooper<sup>1</sup>, Saba Manshaei<sup>1</sup>, Nital Jani<sup>4</sup>, Annett Hölsken<sup>5</sup>, Benedetta Pettorini<sup>6</sup>, Robert J. Beynon<sup>7</sup>, Deborah M. Simpson<sup>7</sup>, Helen C. Fraser<sup>1</sup>, Ying Hong<sup>8</sup>, Shirleen Hallang<sup>9</sup>, Thomas J. Stone<sup>1,2</sup>, Alex Virasami<sup>2</sup>, Andrew M. Donson<sup>10</sup>, David Jones<sup>11</sup>, Kristian Aquilina<sup>12</sup>, Helen Spoudeas<sup>13</sup>, Abhijit R. Joshi<sup>14</sup>, Richard Grundy<sup>15</sup>, Lisa CD Storer<sup>15</sup>, Márta Korbonits<sup>16</sup>, David A. Hilton<sup>17</sup>, Kyoko Tossell<sup>18</sup>, Selvam Thavaraj<sup>19</sup>, Mark A. Ungless<sup>18</sup>, Jesus Gil<sup>18</sup>, Rolf Buslei<sup>5,20</sup>, Todd Hankinson<sup>10</sup>, Darren Hargrave<sup>21</sup>, Colin Goding<sup>22</sup>, Cynthia L. Andoniadou<sup>23,24</sup>, Paul Brogan<sup>8,25</sup>, Thomas S. Jacques<sup>1,2</sup>, Hywel J. Williams<sup>4</sup> and Juan Pedro Martinez-Barbera<sup>1,\*</sup>

- 1) Developmental Biology and Cancer Programme, Birth Defects Research Centre, UCL Great Ormond Street Institute of Child Health, University College London, London, UK
- 2) Histopathology Department, Great Ormond Street Hospital NHS Trust, London, UK
- 3) Basic Research Department, National Institute of Geriatrics, Mexico City, Mexico
- 4) Centre for Translational Omics - GOSgene, Genetics and Genomic Medicine Programme, UCL Institute of Child Health, University College London, London, UK
- 5) Department of Neuropathology, Friedrich-Alexander University Erlangen-Nürnberg (FAU), Erlangen, Germany
- 6) Alder Hey Children's Hospital NHS Foundation Trust, Liverpool, UK
- 7) Centre for Proteome Research, Institute of Integrative Biology, University of Liverpool, UK
- 8) Infection, Immunity and Inflammation Programme, UCL Great Ormond Street Institute of Child Health, University College London, London, UK
- 9) Centre for Craniofacial and Regenerative Biology, King's College London, London, UK
- 10) Department of Pediatrics, University of Colorado Anschutz Medical Campus, Aurora, Colorado
- 11) German Cancer Research Center (DKFZ), Heidelberg, Germany
- 12) Neurosurgery Department, Great Ormond Street Hospital NHS Trust, London, UK
- 13) Endocrinology Department, Great Ormond Street Hospital NHS Trust, London, UK
- 14) Laboratory Medicine, Royal Victoria Infirmary, Newcastle, UK
- 15) Children's Brain Tumour Research Centre, University of Nottingham, Nottingham, UK
- 16) William Harvey research Institute, Barts and the London School of Medicine and Dentistry, Queen Mary University, London, UK
- 17) Pathology Department, Plymouth Hospitals NHS Trust, Plymouth, UK
- 18) MRC London Institute of Medical Sciences, Imperial College London, London, UK
- 19) Head and Neck Pathology, Dental Institute, King's College London, London, UK
- 20) Institute of Pathology, Klinikum Sozialstiftung Bamberg, Bamberg, Germany
- 21) Haematology and Oncology department, Great Ormond Street Hospital NHS Trust, London, UK
- 22) Ludwig Institute for Cancer Research, Oxford University, Old Road Campus, Headington, Oxford, UK
- 23) Centre for Craniofacial and Regenerative Biology, King's College London, Guy's Hospital, Floor 27 Tower Wing, London, UK
- 24) Department of Internal Medicine III, Technische Universität Dresden, Fetscherstraße 74, 01307 Dresden, Germany
- 25) Rheumatology department, Great Ormond Street Hospital NHS Trust, London, UK

\* Corresponding authors: John Apps [j.apps@ucl.ac.uk](mailto:j.apps@ucl.ac.uk), JP Martinez-Barbera, [j.martinez-barbera@ucl.ac.uk](mailto:j.martinez-barbera@ucl.ac.uk). +44 (0) 207 905 2821

# SUPPL. FIGURE 1

**a**

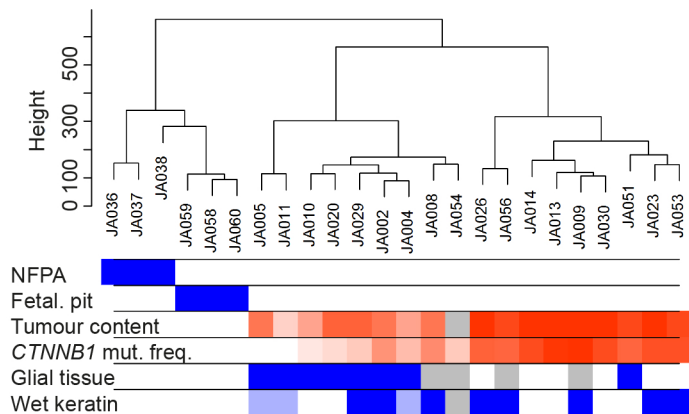

**b**

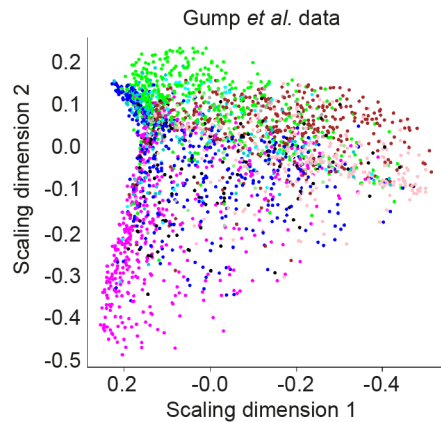

**c**

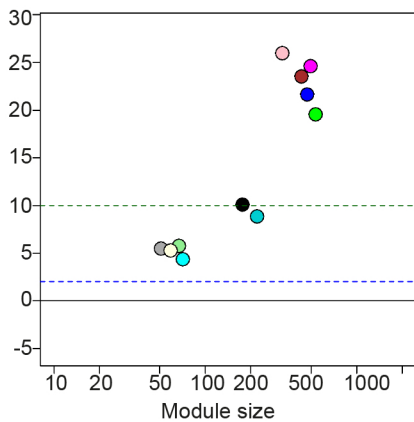

# SUPPL. FIGURE 2

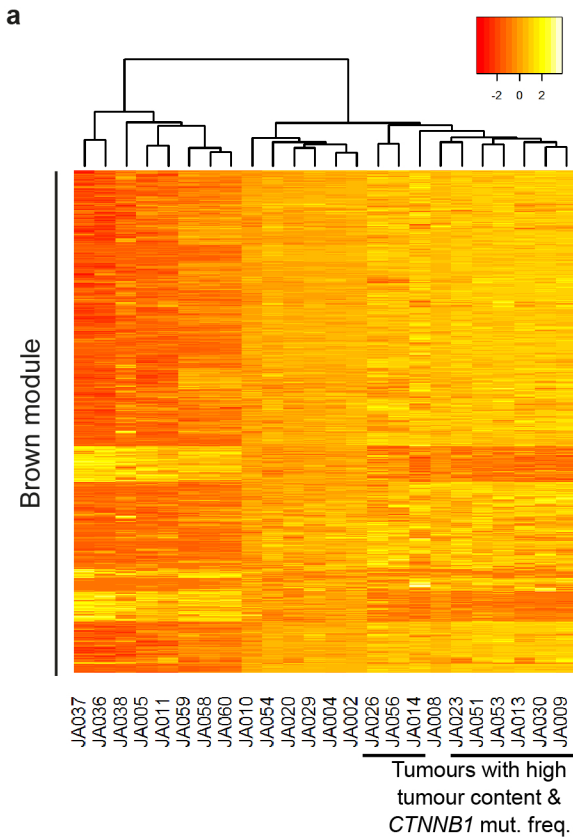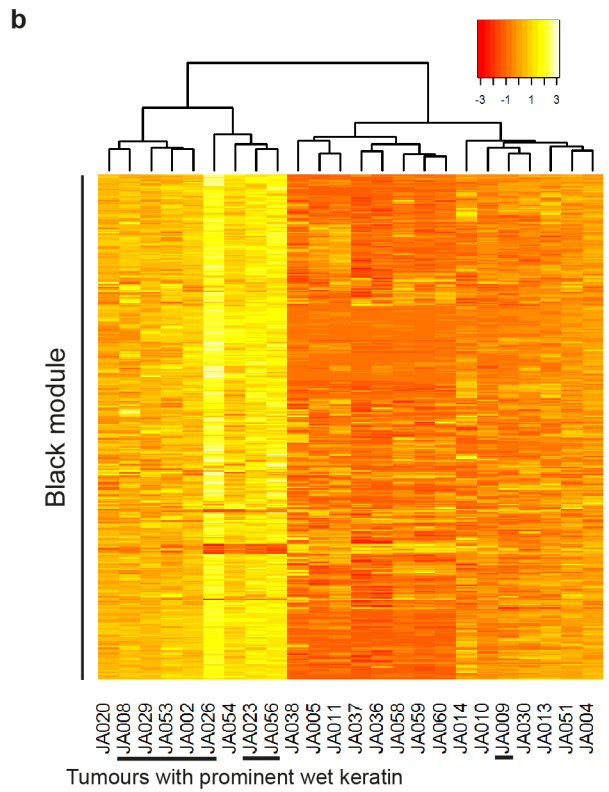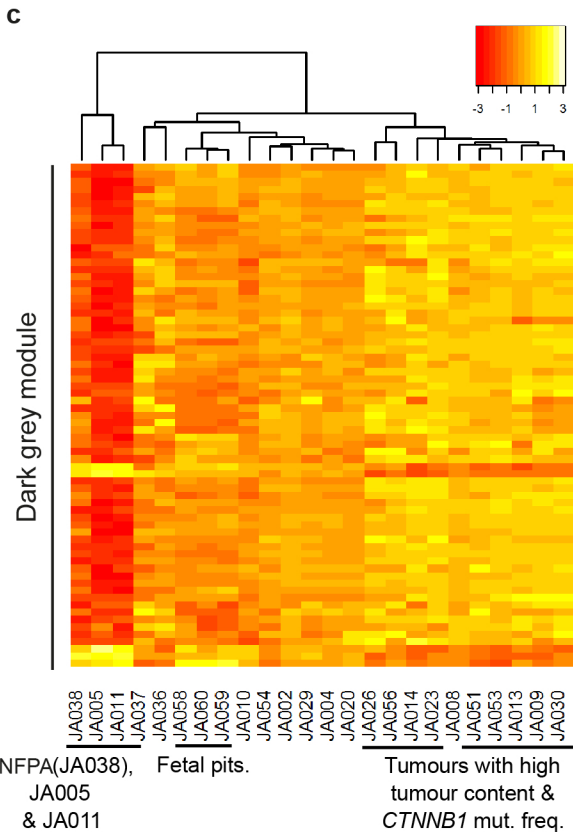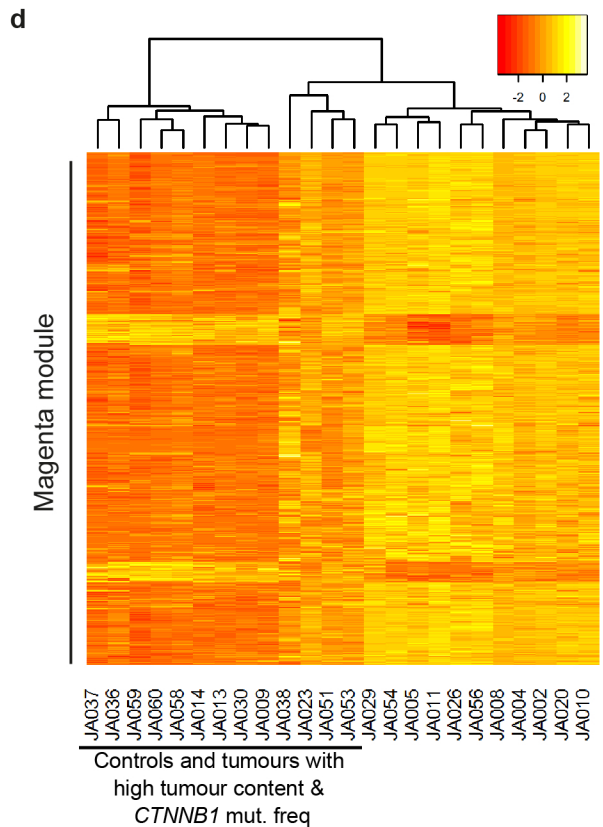

SUPPL. FIGURE 3

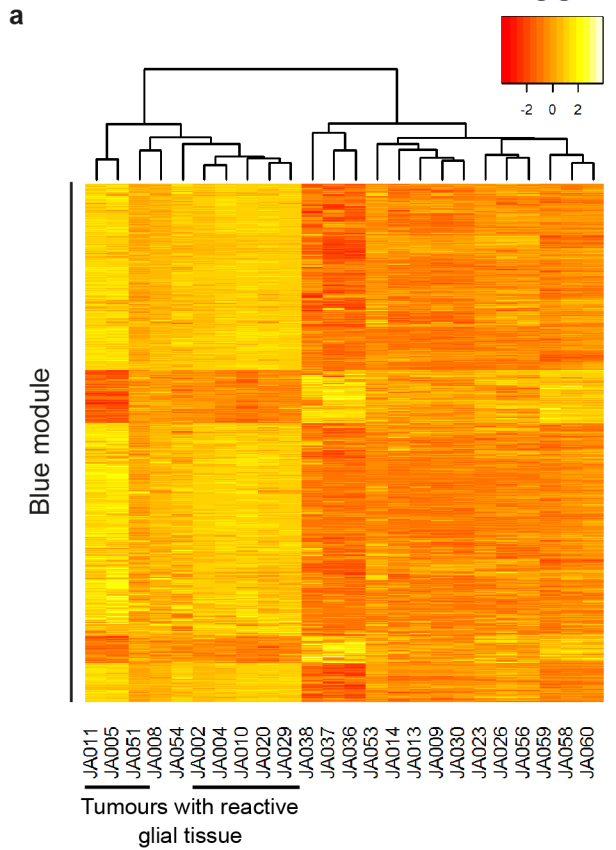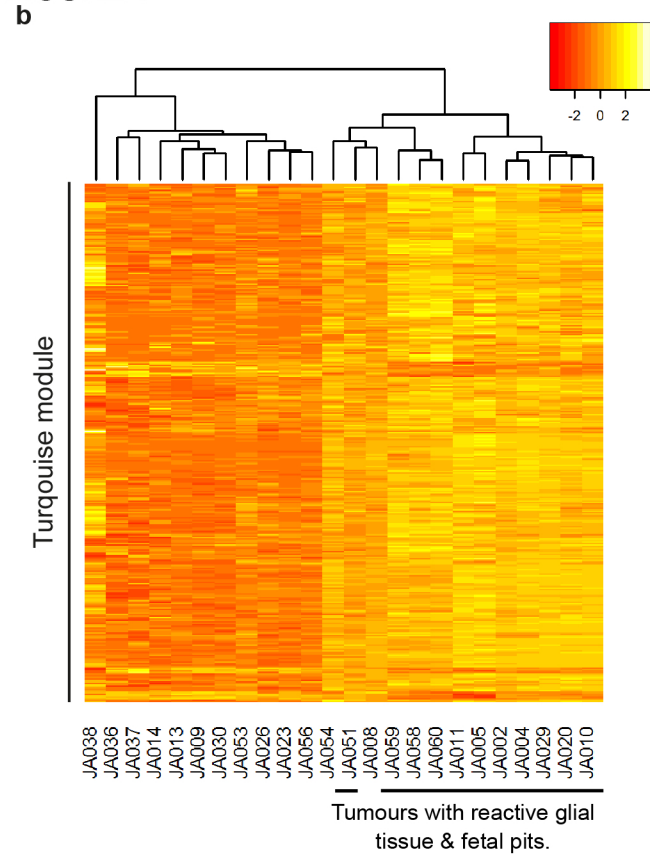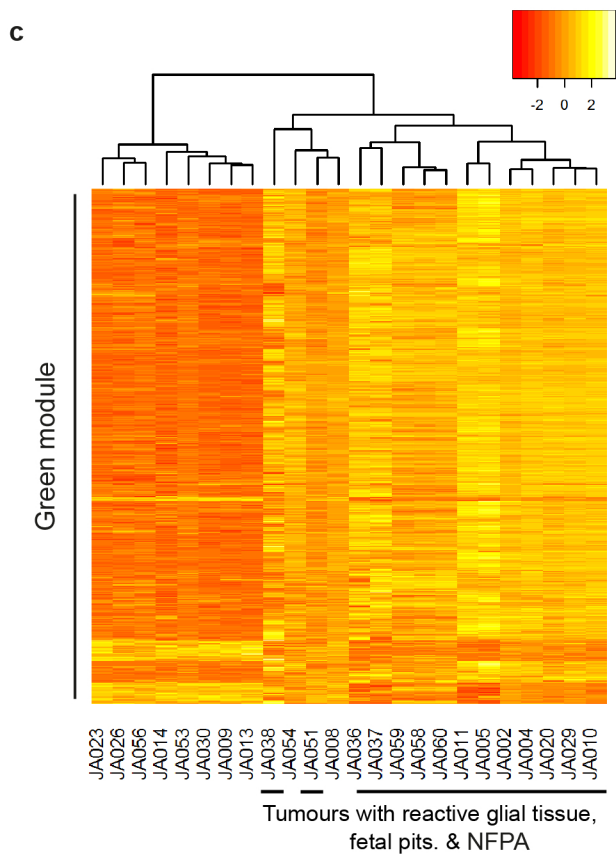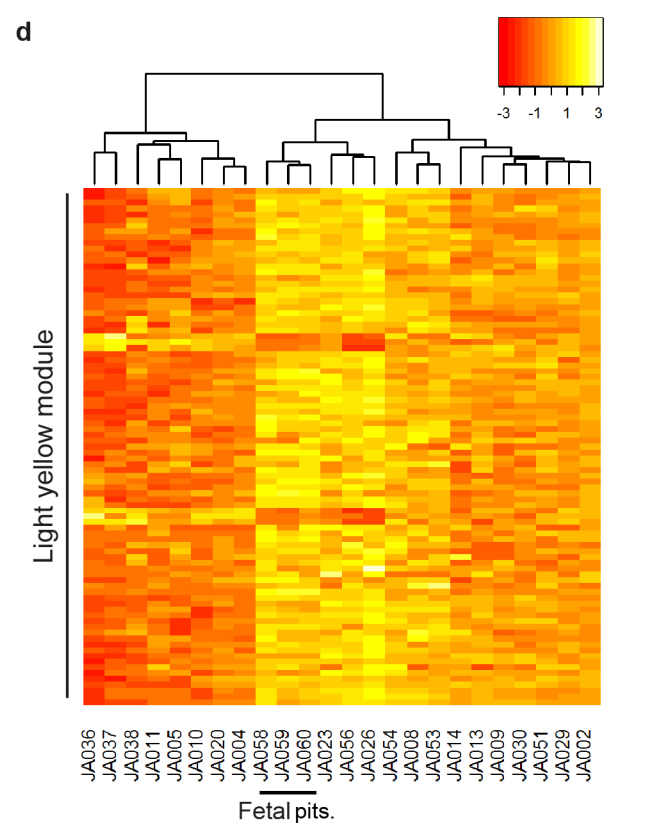

SUPL. FIGURE 4

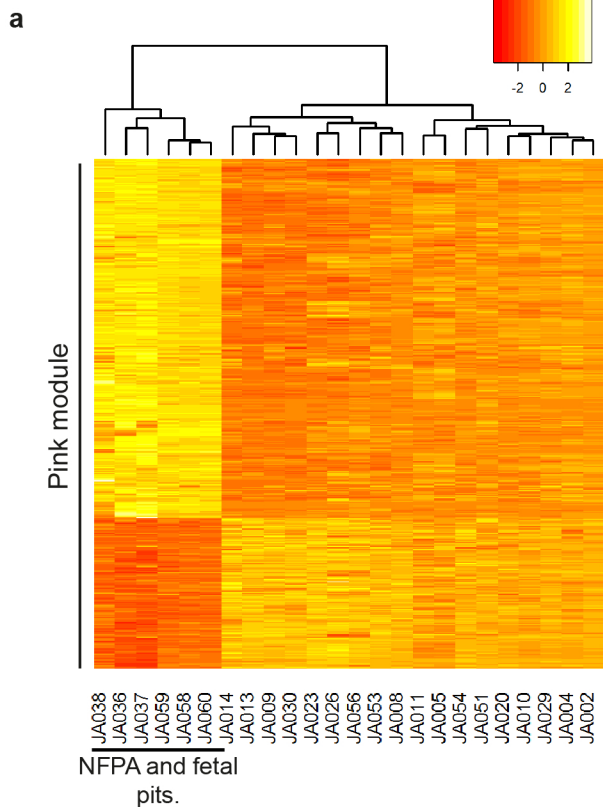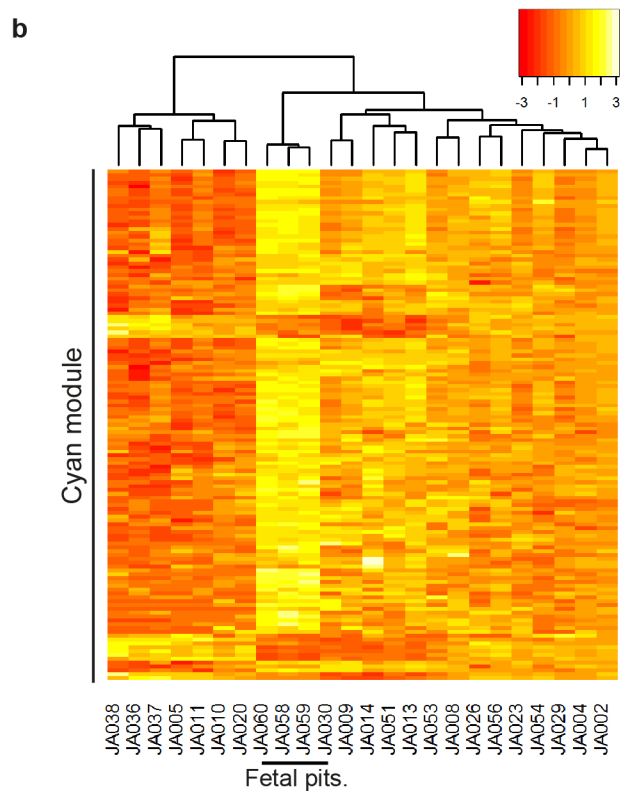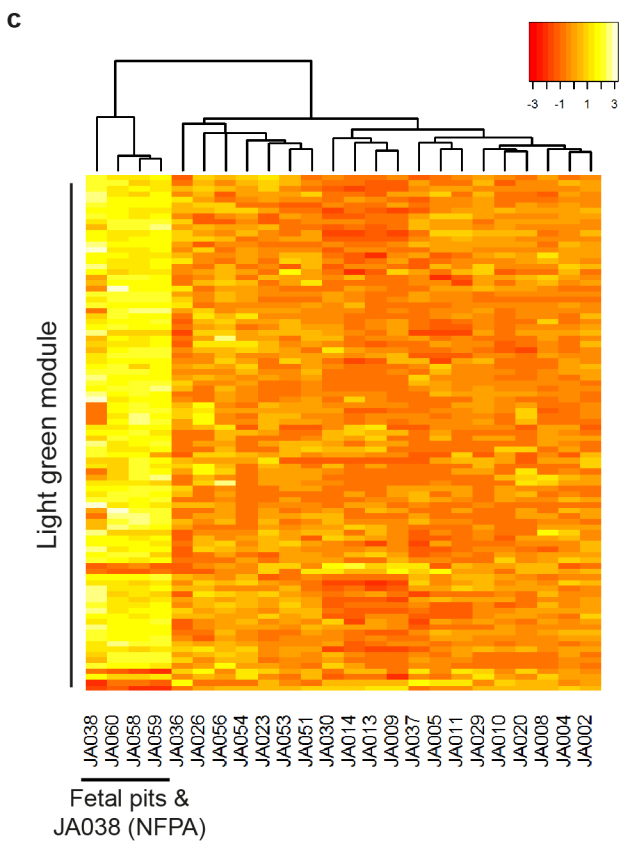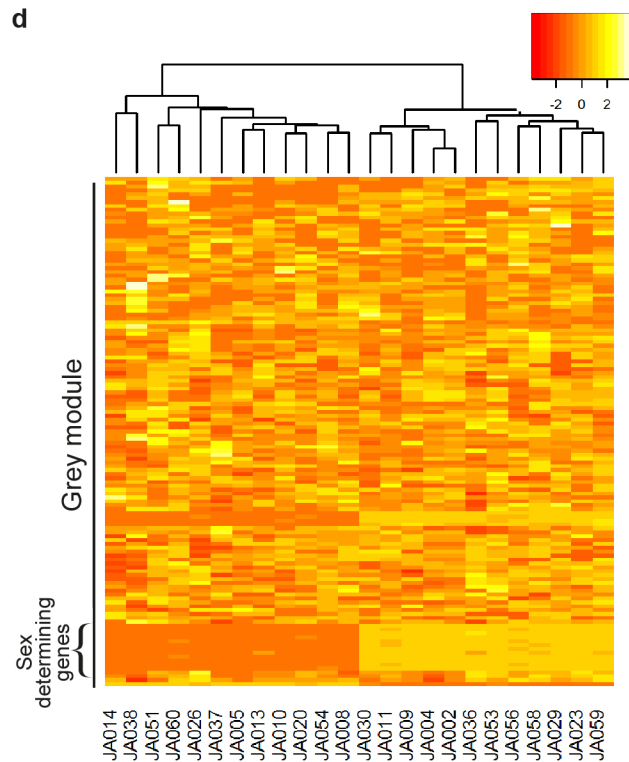

SUPPL. FIGURE 5  
Human ACPs

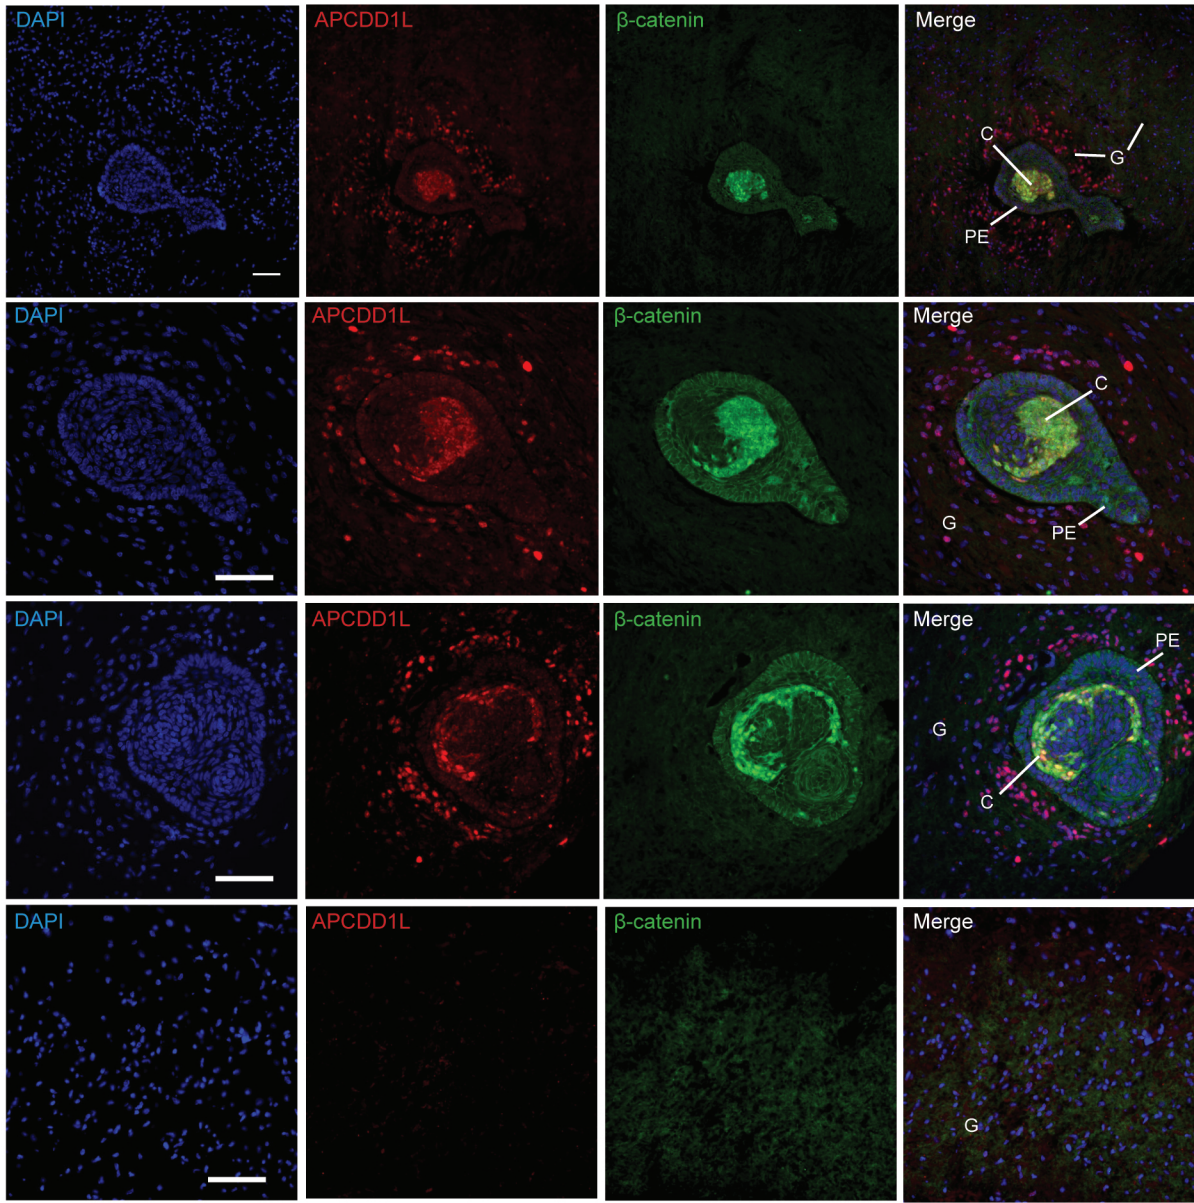

# SUPPL. FIGURE 6

**a**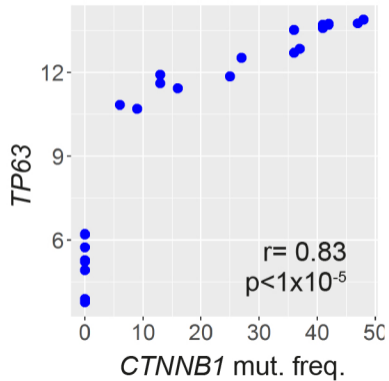**b**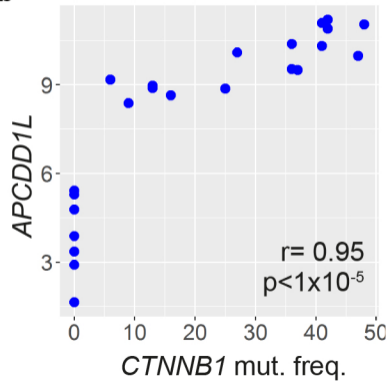**c**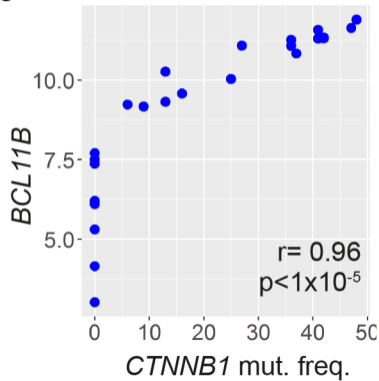

# SUPPL. FIGURE 7

**a**

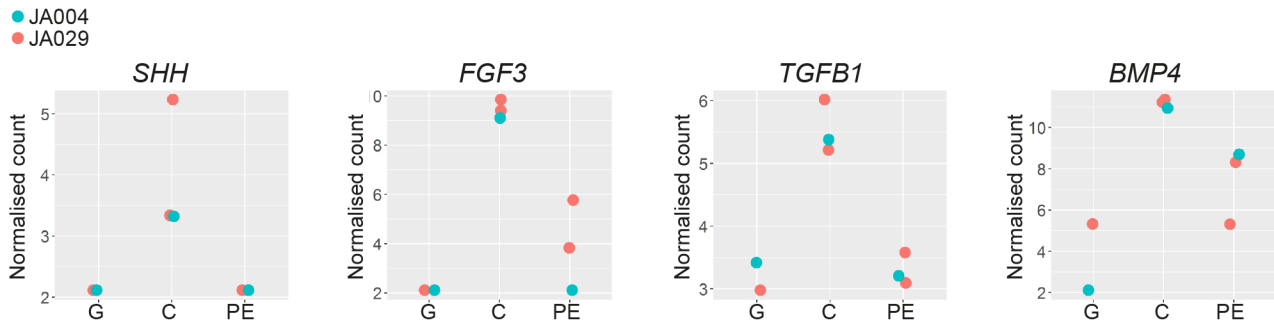

**b**

- Clusters
- Palisading epithelium
- Glial reactive tissue

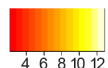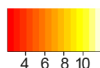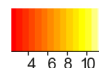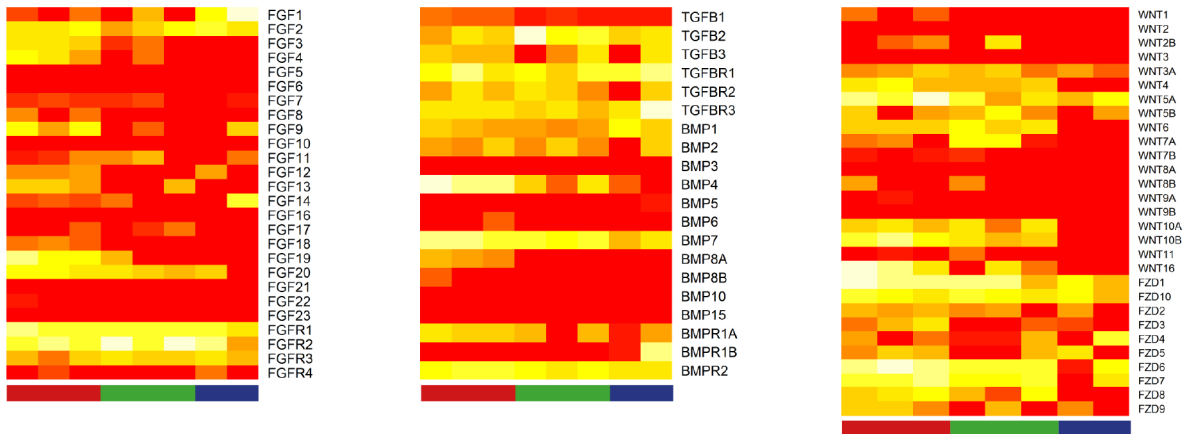



# SUPPL. FIGURE 8

**a**

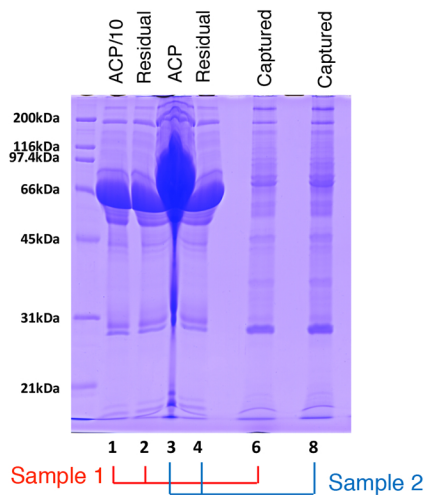

**b**

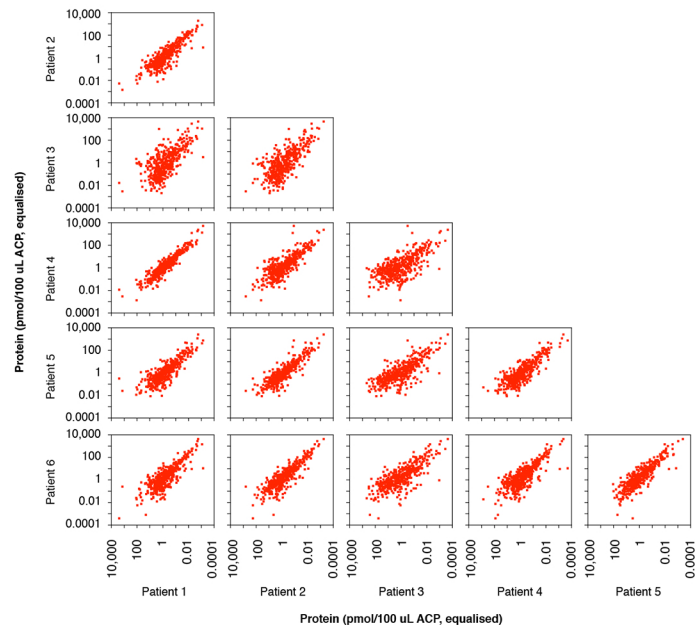

**c**

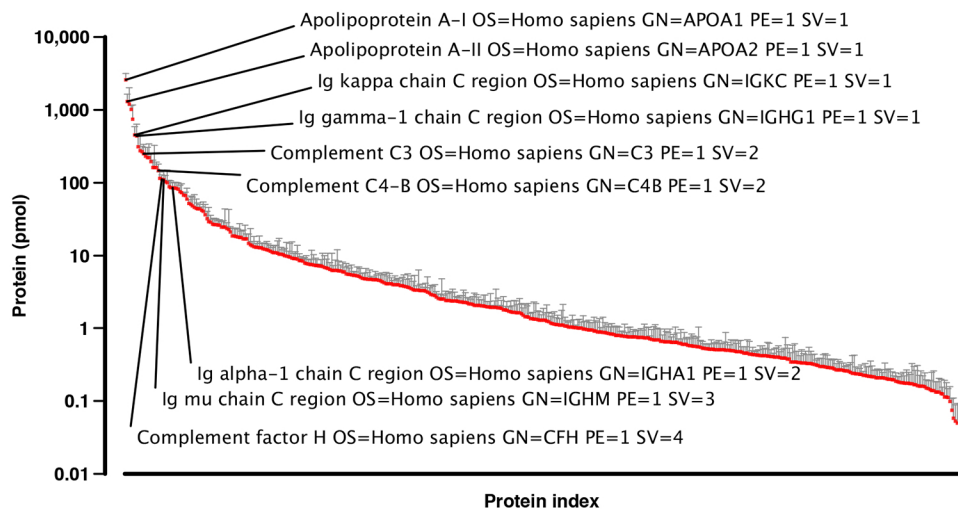

**d**

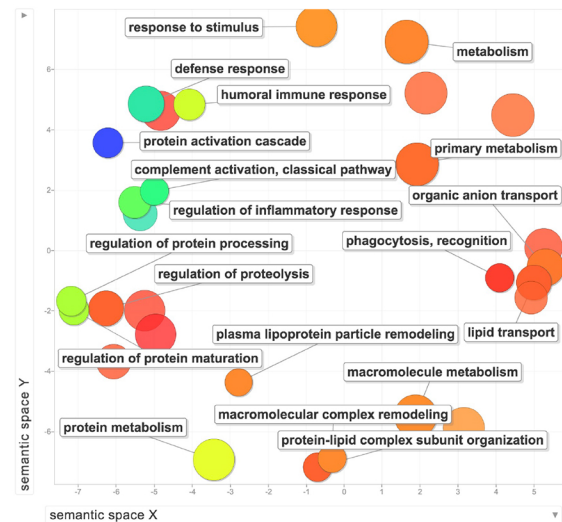

Supplement: MOESM9 [file 15533790]
